# Supplementary material for: Active Observation of Biochemical Recurrence without Treatment following Radical Prostatectomy: Long-Term Analysis of Outcomes
Source: MDPI journal article supplement (doi:10.3390/cancers14174078), 2022-08-23
Supplement: s1 [file s1]

**Table S1.** Noninferiority analysis of observed versus predicted PCSM.

| Time (Years) | Our PCSM | Predicted PCSM<br>(Brockman et al.) |          | <i>p</i> -value |
|--------------|----------|-------------------------------------|----------|-----------------|
|              |          | <i>n</i>                            | <i>n</i> |                 |
| 5            | 0.031    | 277                                 | 327      | 0.6402          |
| 10           | 0.095    | 136                                 | 327      | 0.7836          |

PCSM = Prostate Cancer Specific Mortality
